# Supplementary material for: FlpStop, a tool for conditional gene control in Drosophila
Source: eLife journal article supplement (doi:10.7554/elife.22279), 2017-02-17

1)

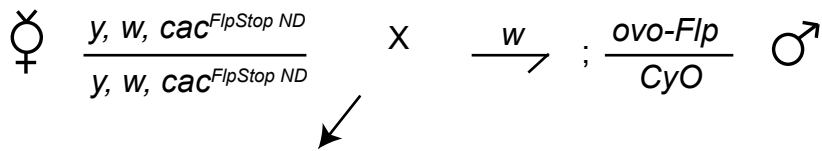

2)

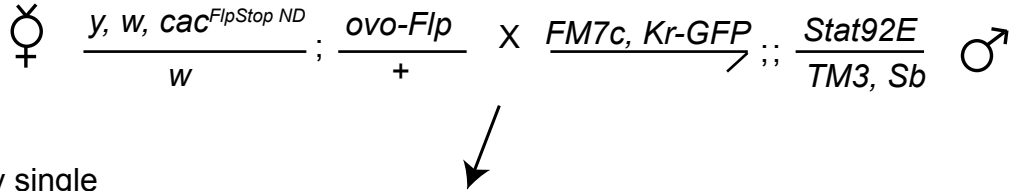

3) many single virgin crosses

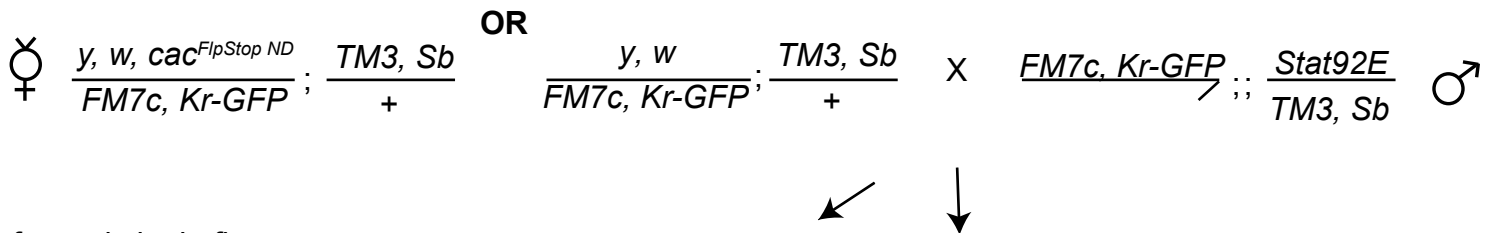

4) performed single fly PCR on female progeny from crosses where only FM7-bearing males were viable

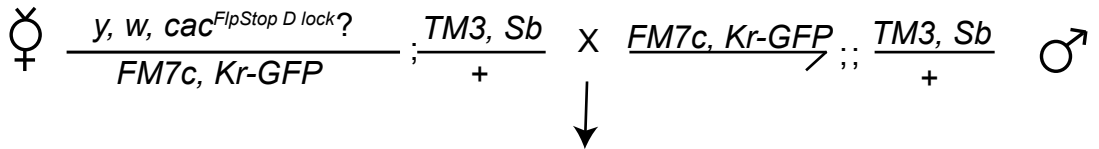

5) established stable line

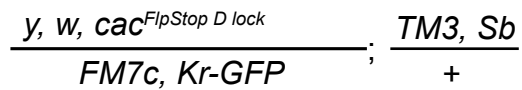

Supplement: supp [file elife-22279-supp-v1.zip]
