# Supplementary material for: FlpStop, a tool for conditional gene control in Drosophila
Source: eLife journal article supplement (doi:10.7554/elife.22279), 2017-02-17

*Mi1<sup>R19F01</sup>-Gal4,*  
*UAS-Flp,*  
*UAS-mCD8::GFP,*  
*Gene X<sup>FlpStop ND</sup>*

*nSyb<sup>R57C10</sup>-Gal4,*  
*UAS-Flp,*  
*Gene X<sup>FlpStop ND</sup>*

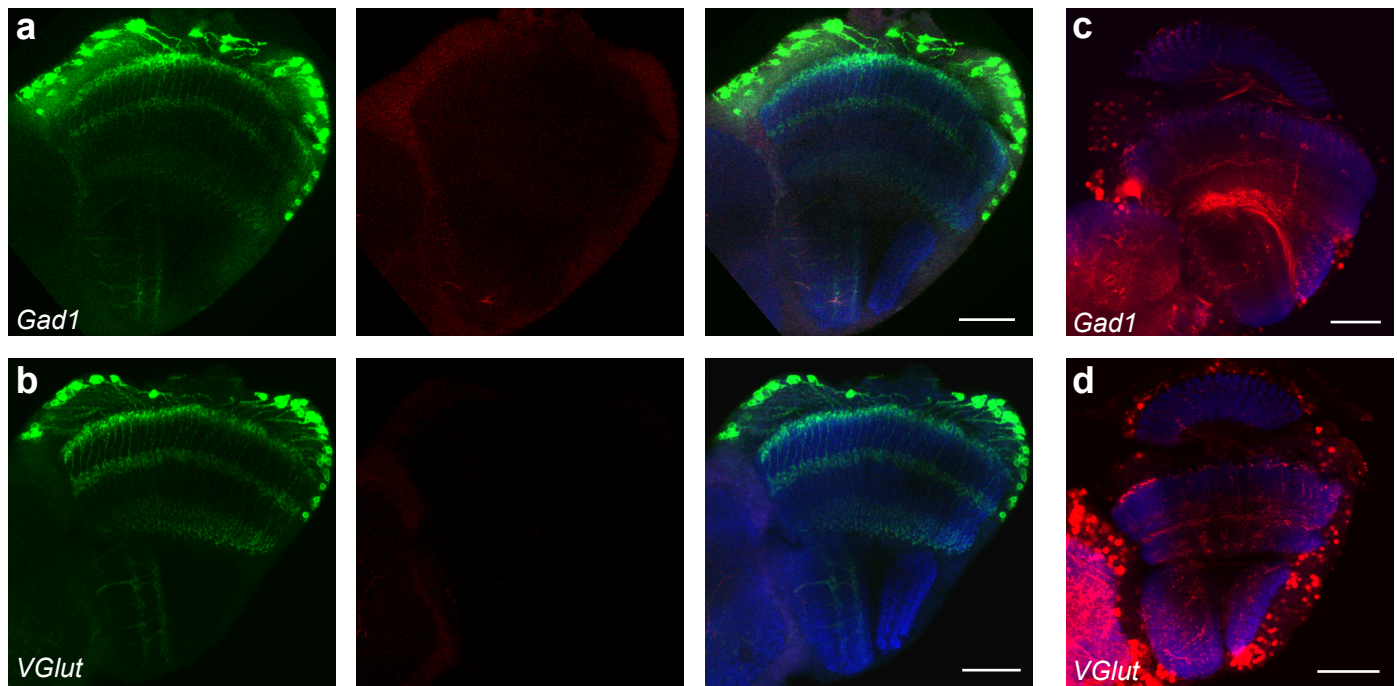

Supplement: supp [file elife-22279-supp-v1.zip]
