# Supplementary figures and images for: FlpStop, a tool for conditional gene control in Drosophila
Source: eLife journal article supplement (doi:10.7554/elife.22279), 2017-02-17

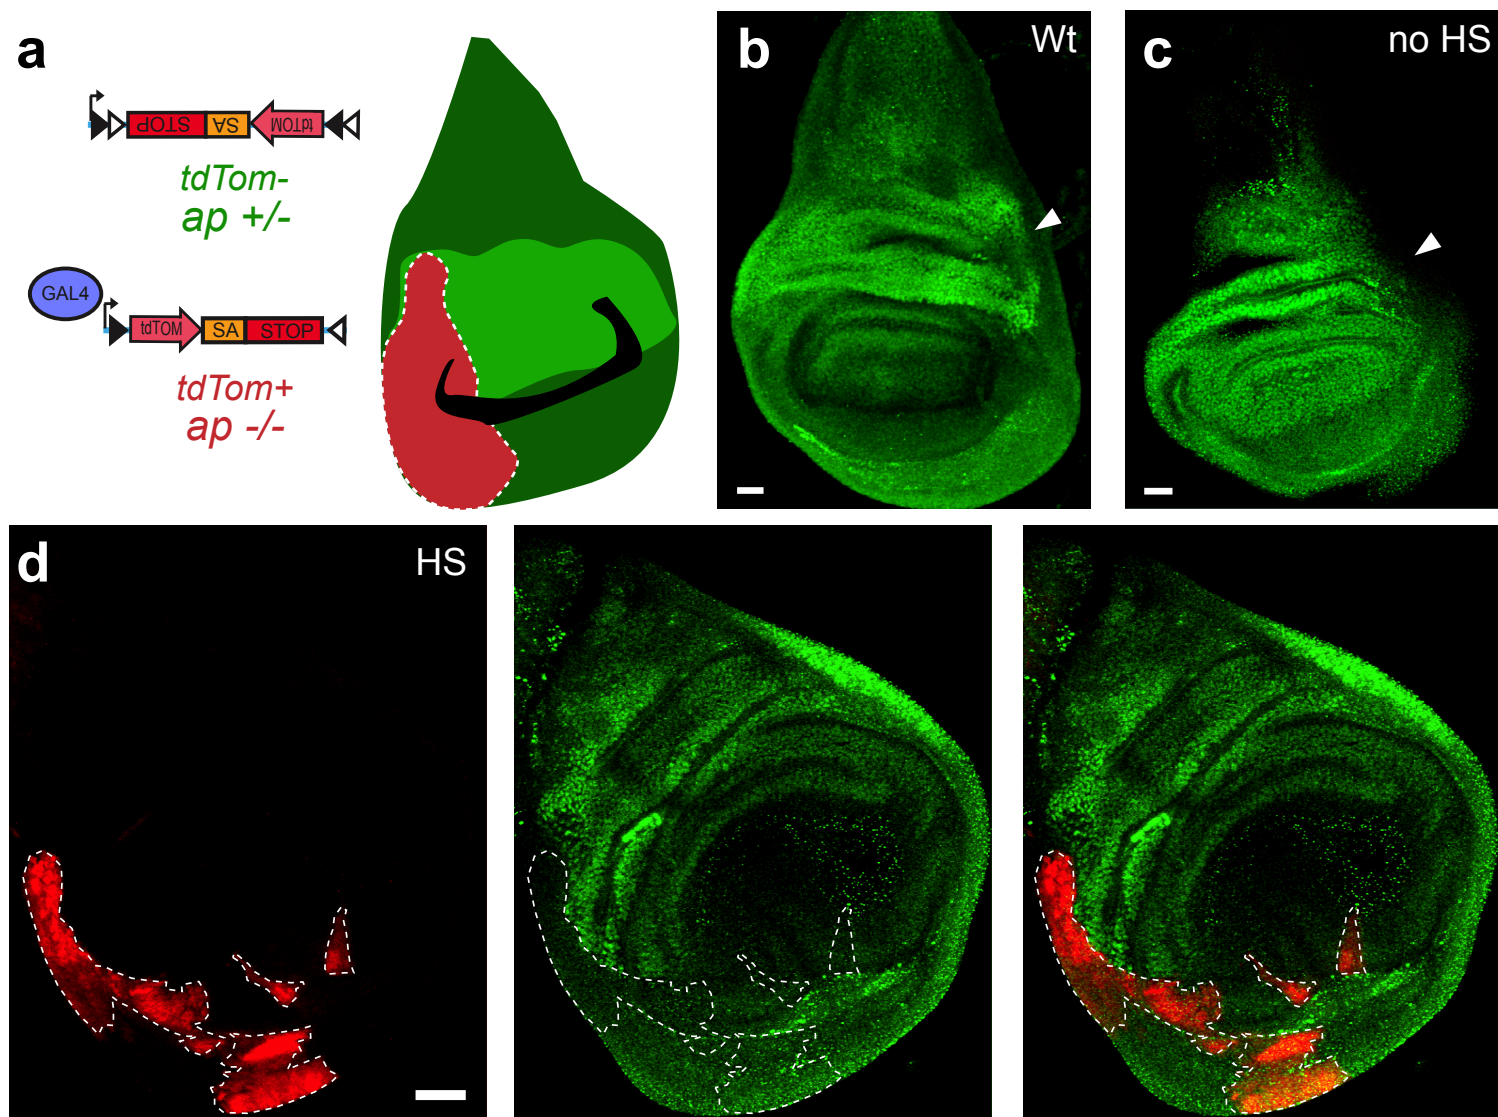

Supplement: supp [file elife-22279-supp-v1.zip]

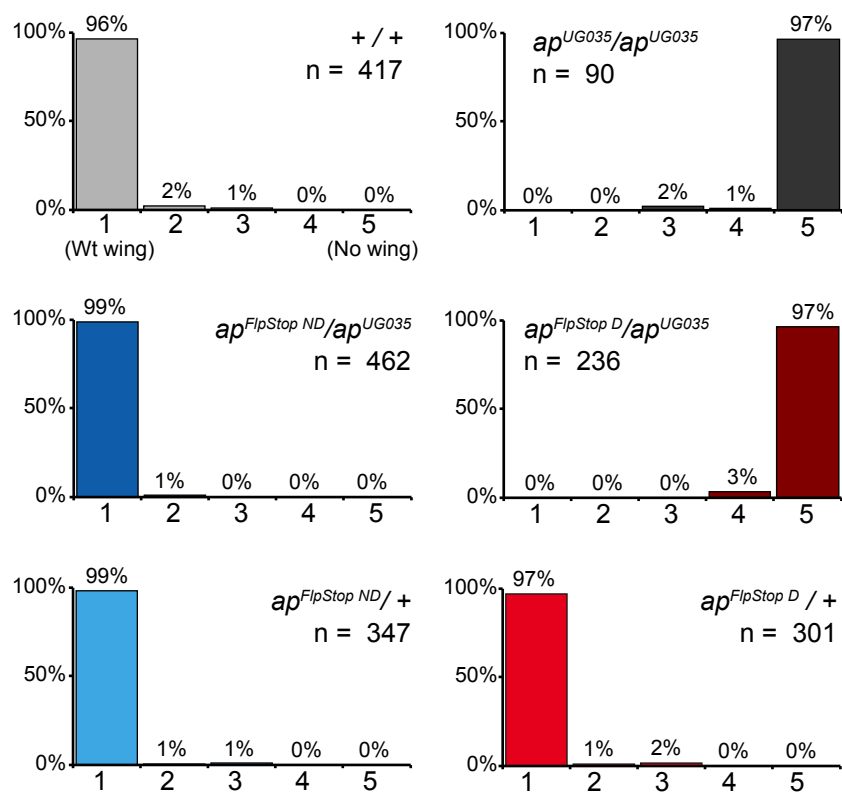

Supplement: supp [file elife-22279-supp-v1.zip]

**a** Lethality*VGlut*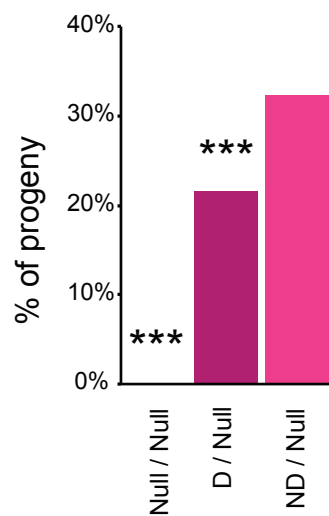**b***ChAT*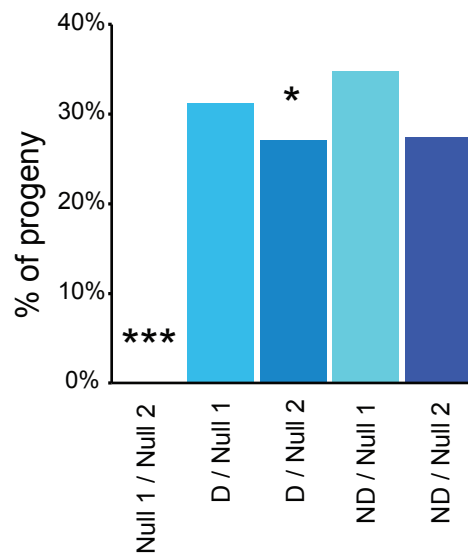**c** qRT-PCR*Shal*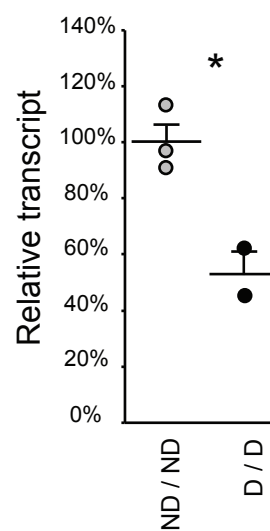

Supplement: supp [file elife-22279-supp-v1.zip]

**a**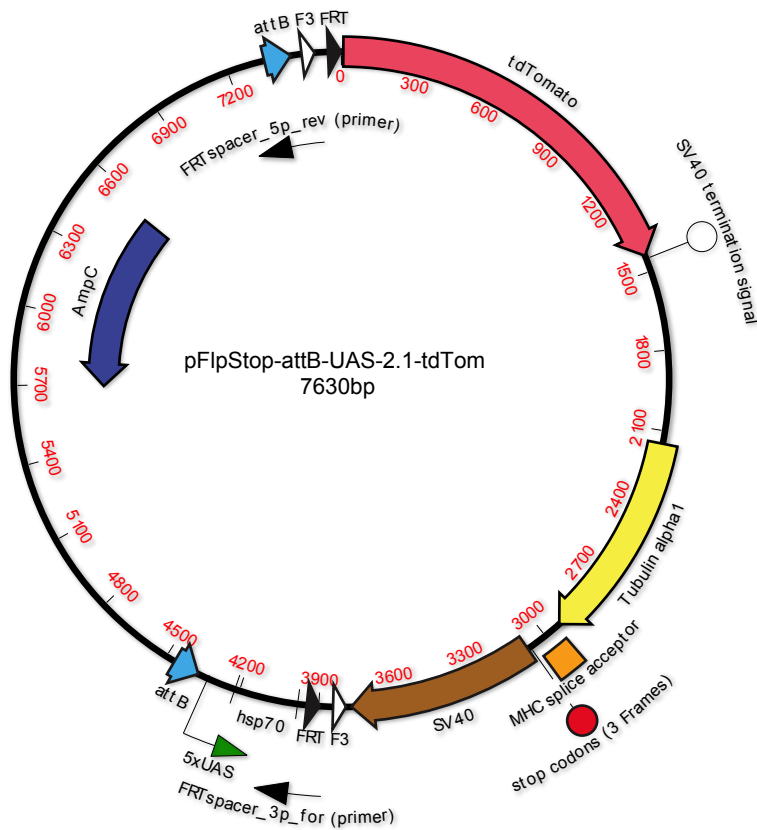**b**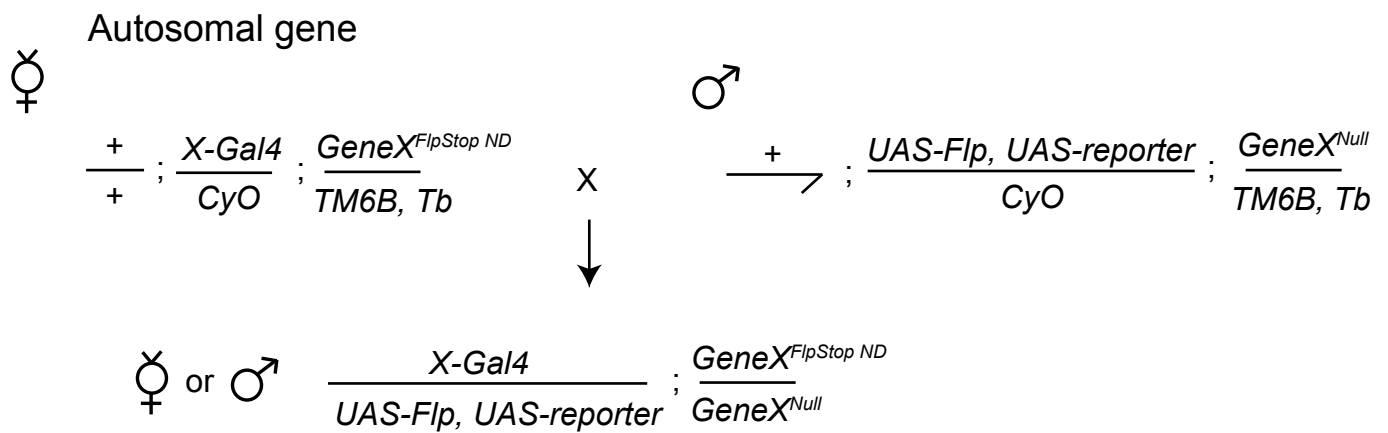**c**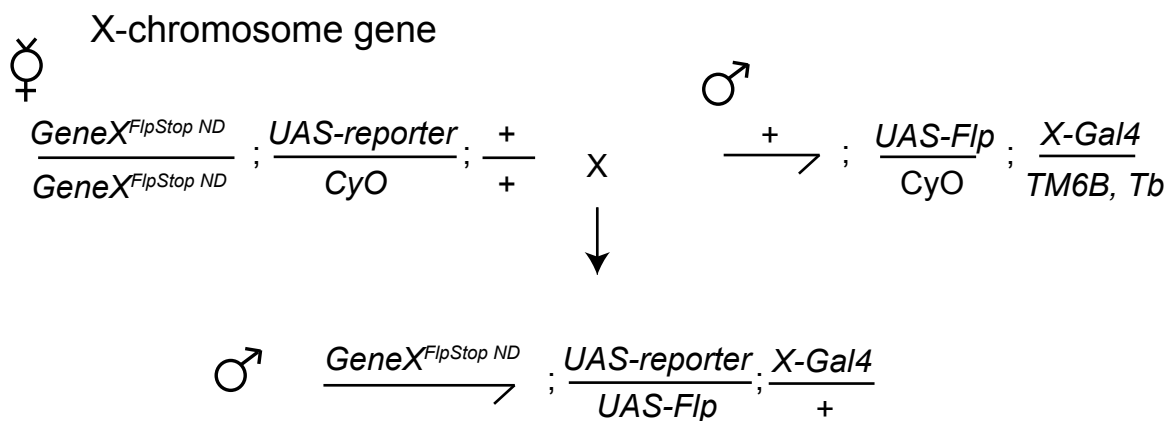

Supplement: supp [file elife-22279-supp-v1.zip]

**a**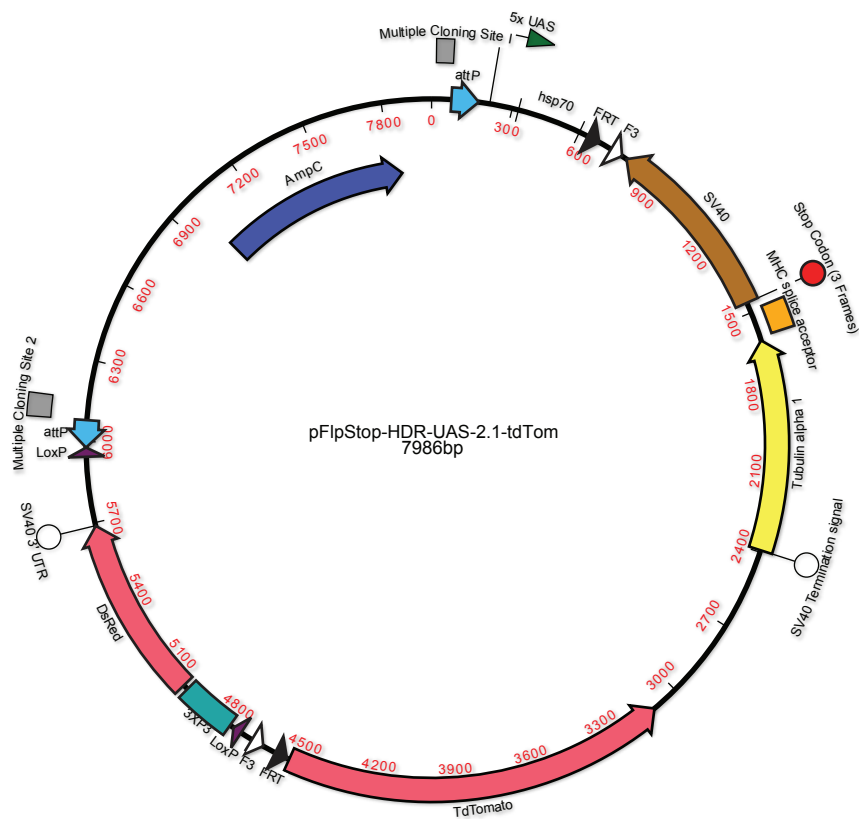**b**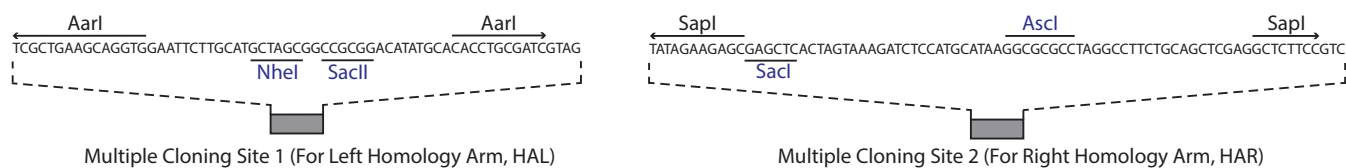**c**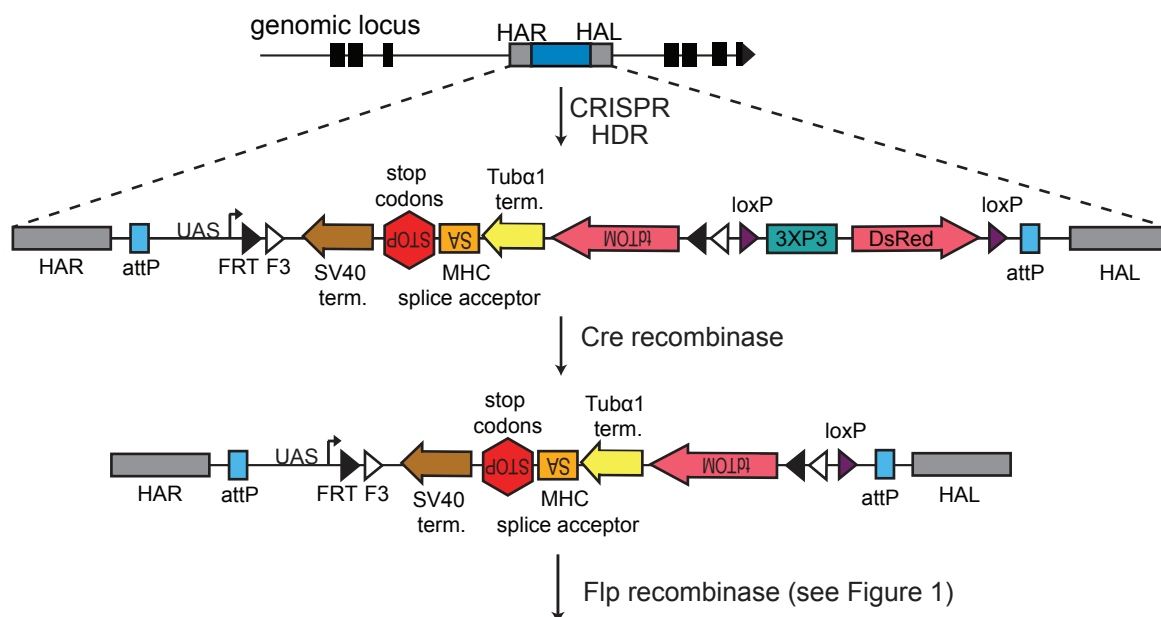

Supplement: supp [file elife-22279-supp-v1.zip]
